# Supplementary material for: STAT3/LKB1 controls metastatic prostate cancer by regulating mTORC1/CREB pathway
Source: PubMed Central journal article supplement (PMC10422794; doi:10.1186/s12943-023-01825-8), 2023-08-12
Supplement: 12943_2023_1825_MOESM1_ESM.pdf [file 12943_2023_1825_MOESM1_ESM.pdf]

**A**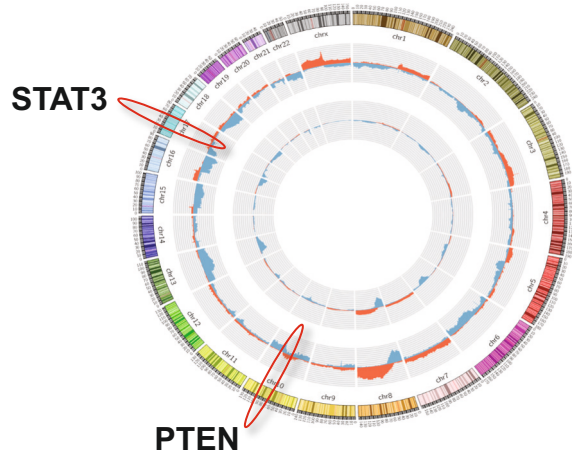**B**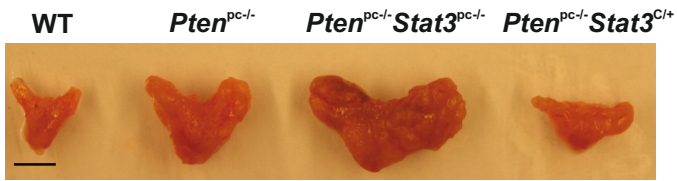**C**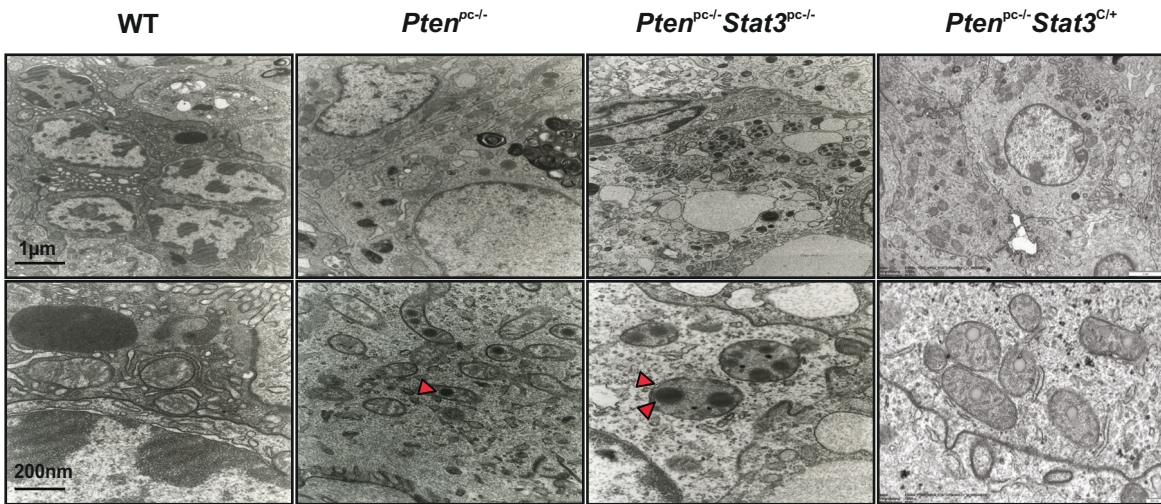

**A**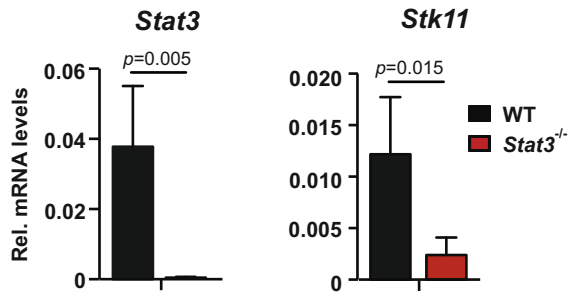**B**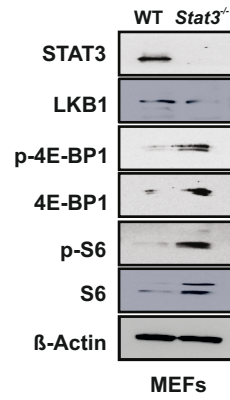**C**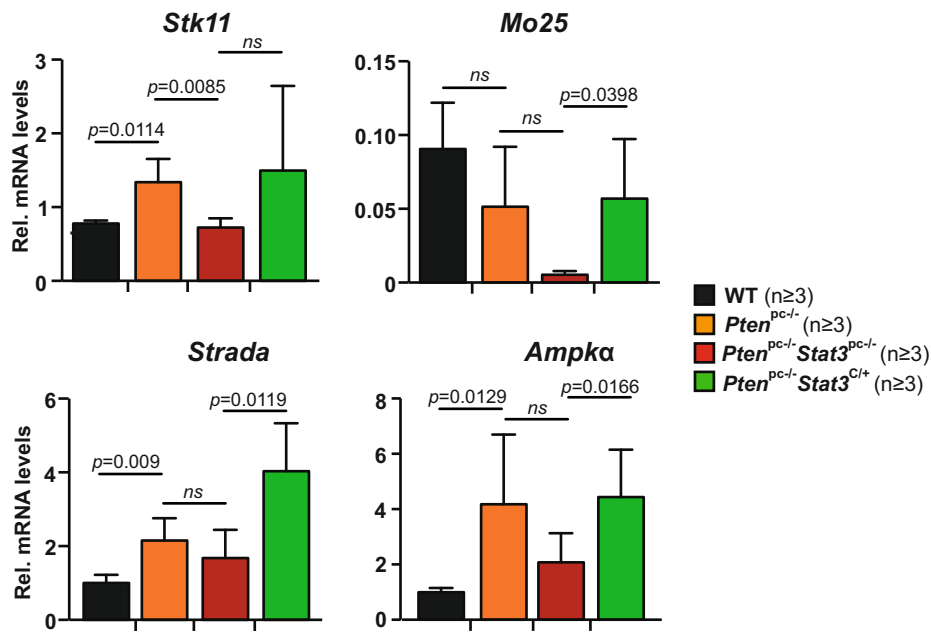

A

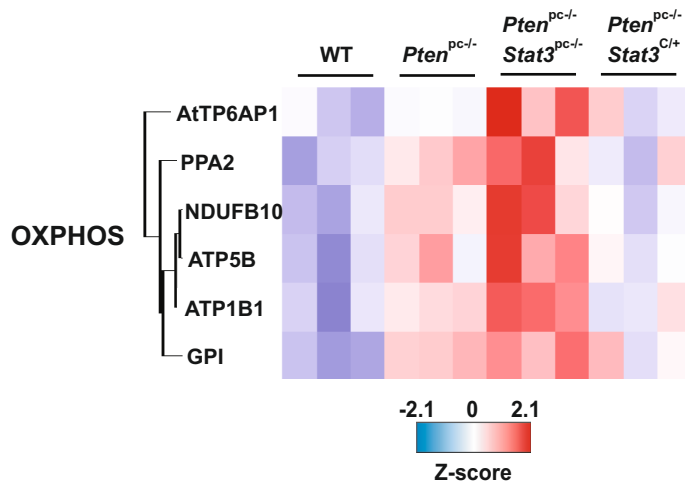

B

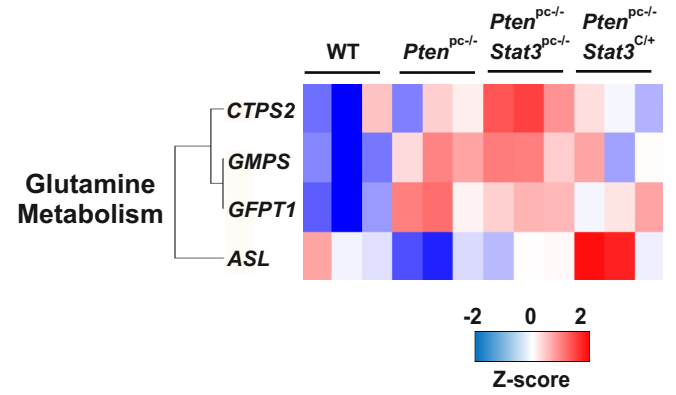

C

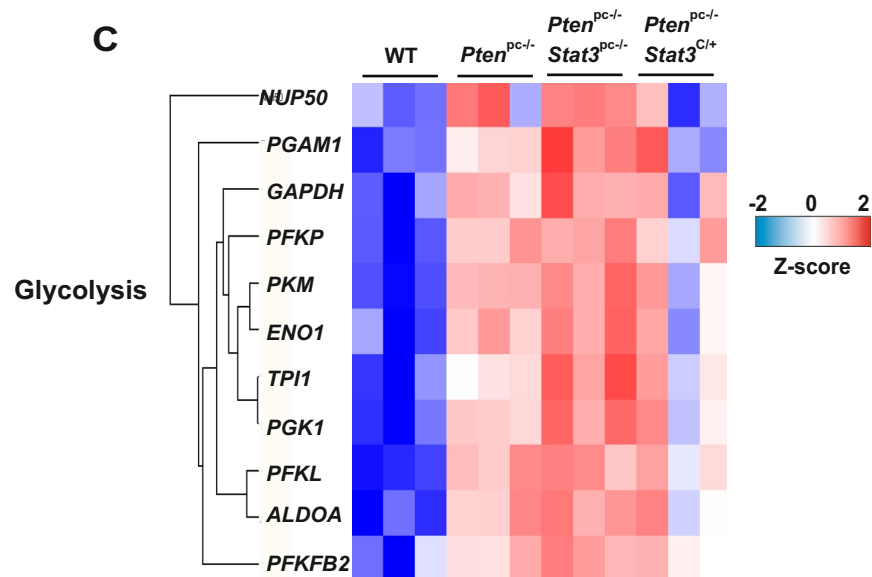

D

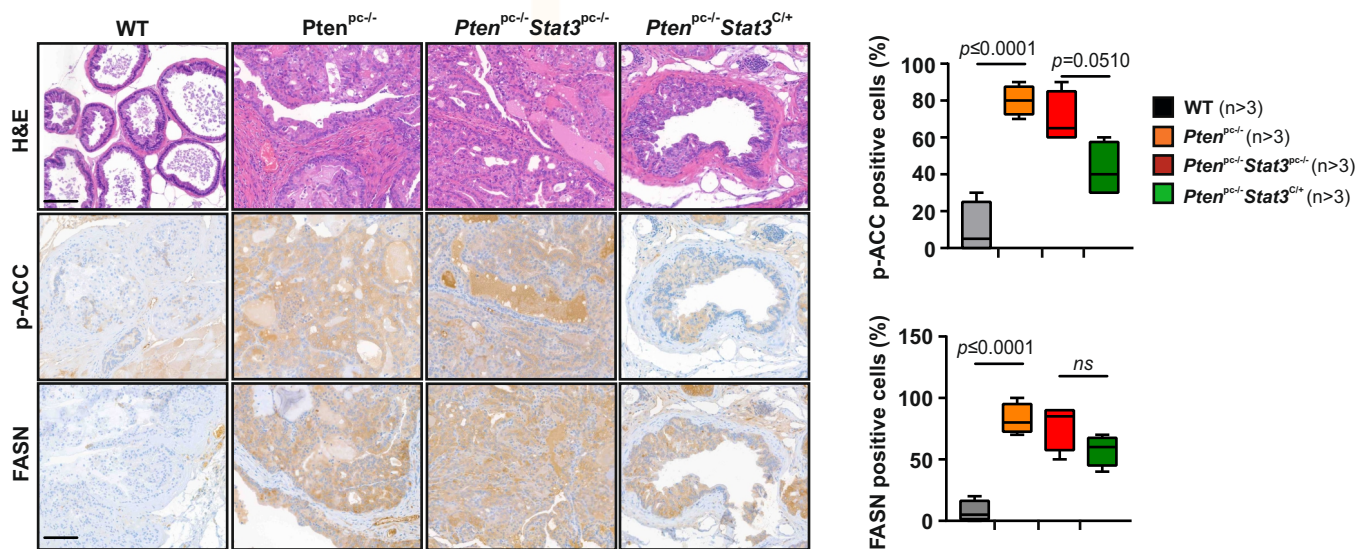

E

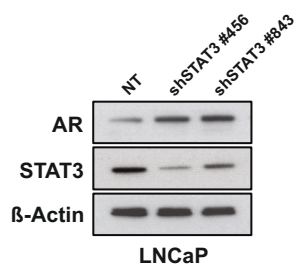

**A**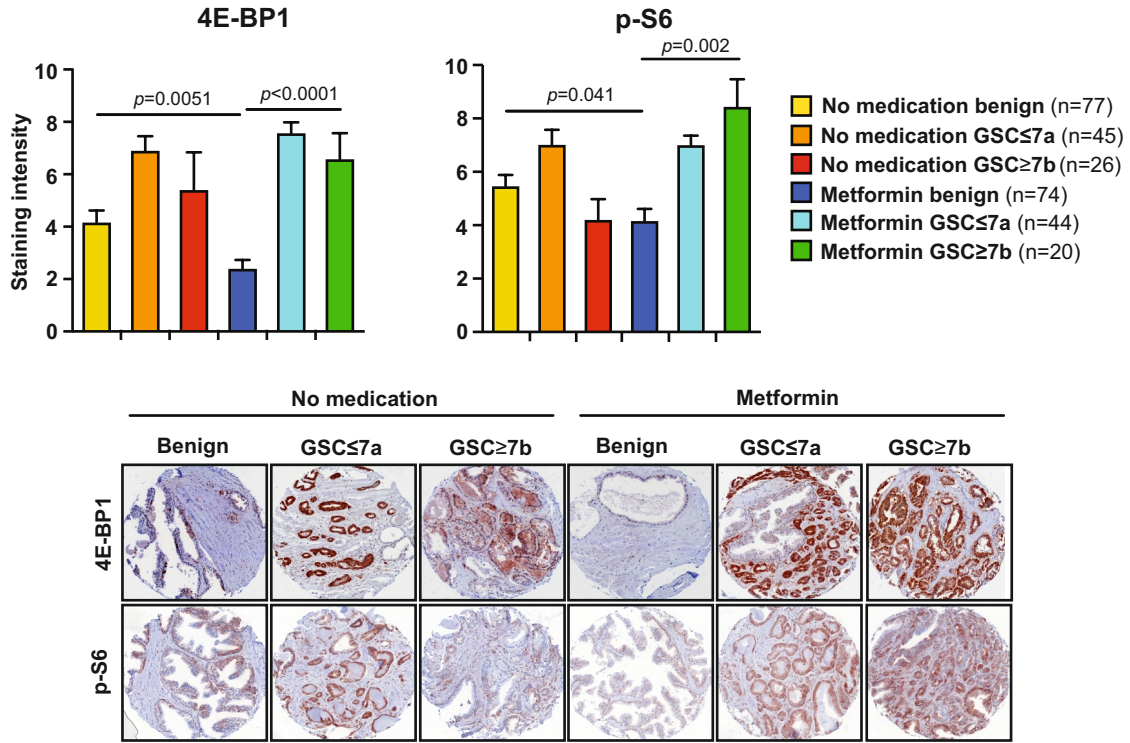**B**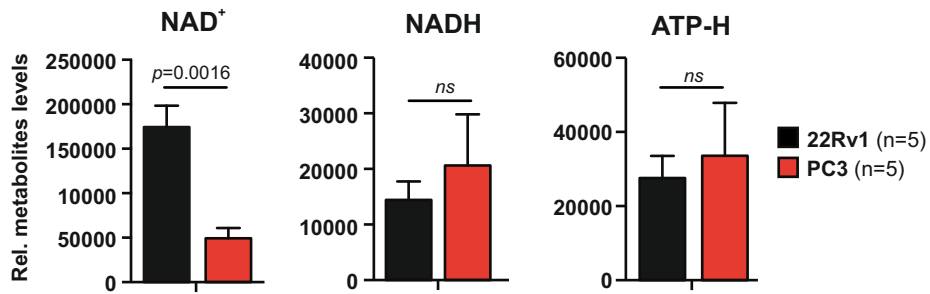**C**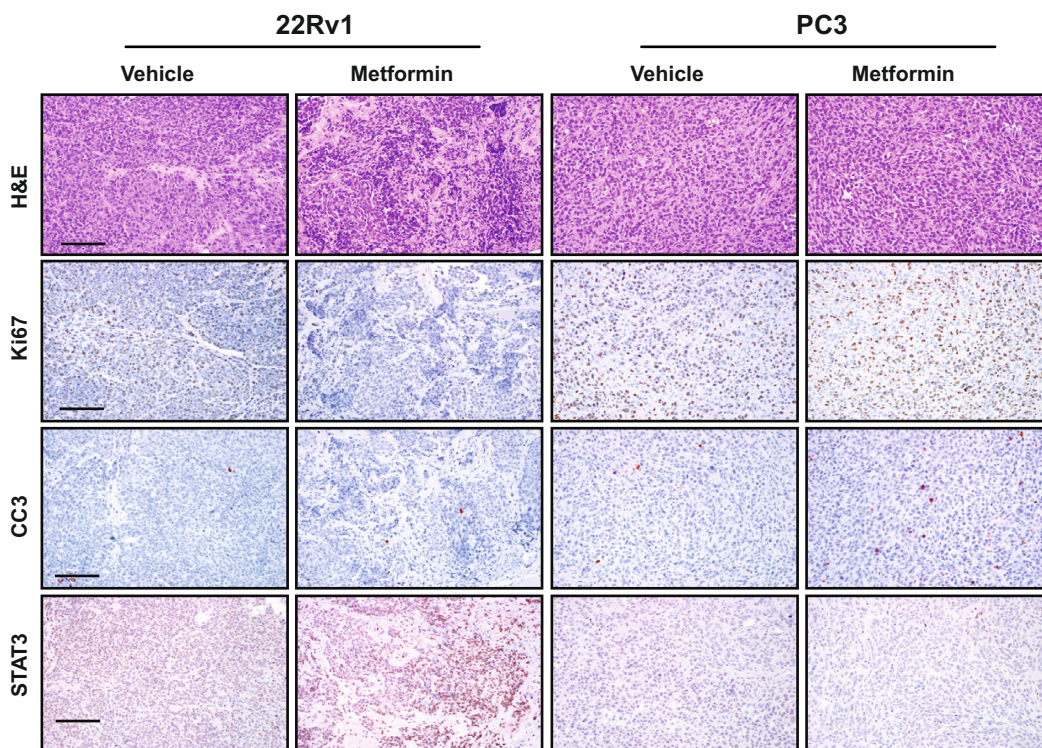

**D**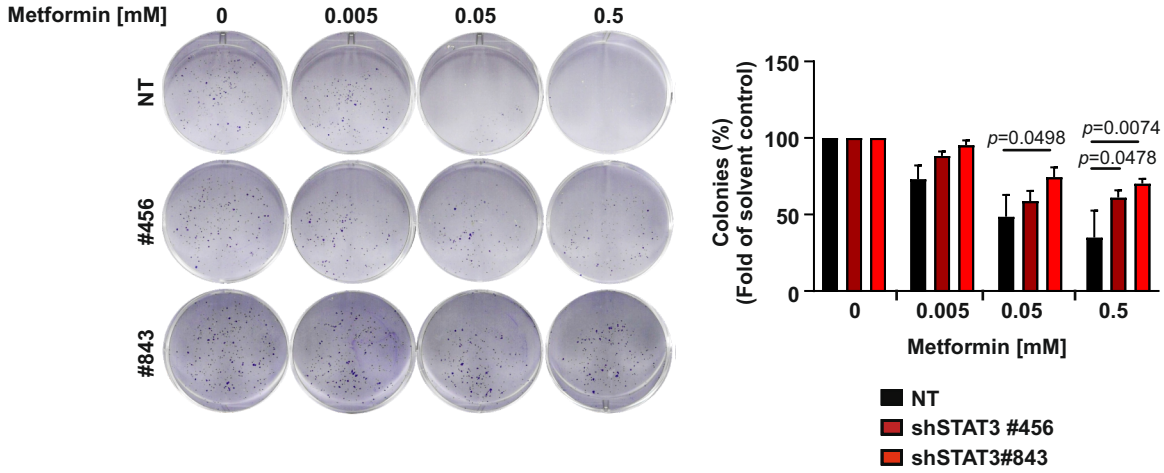**E**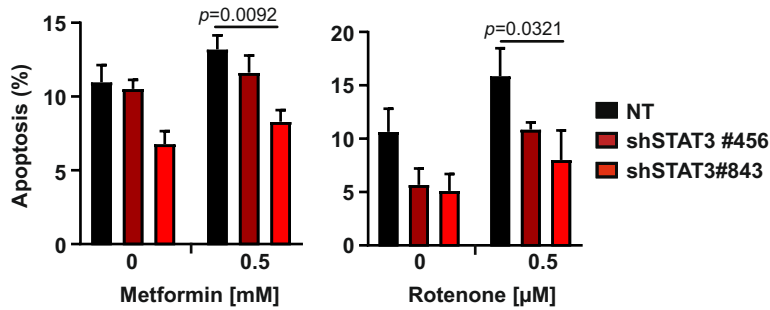**F**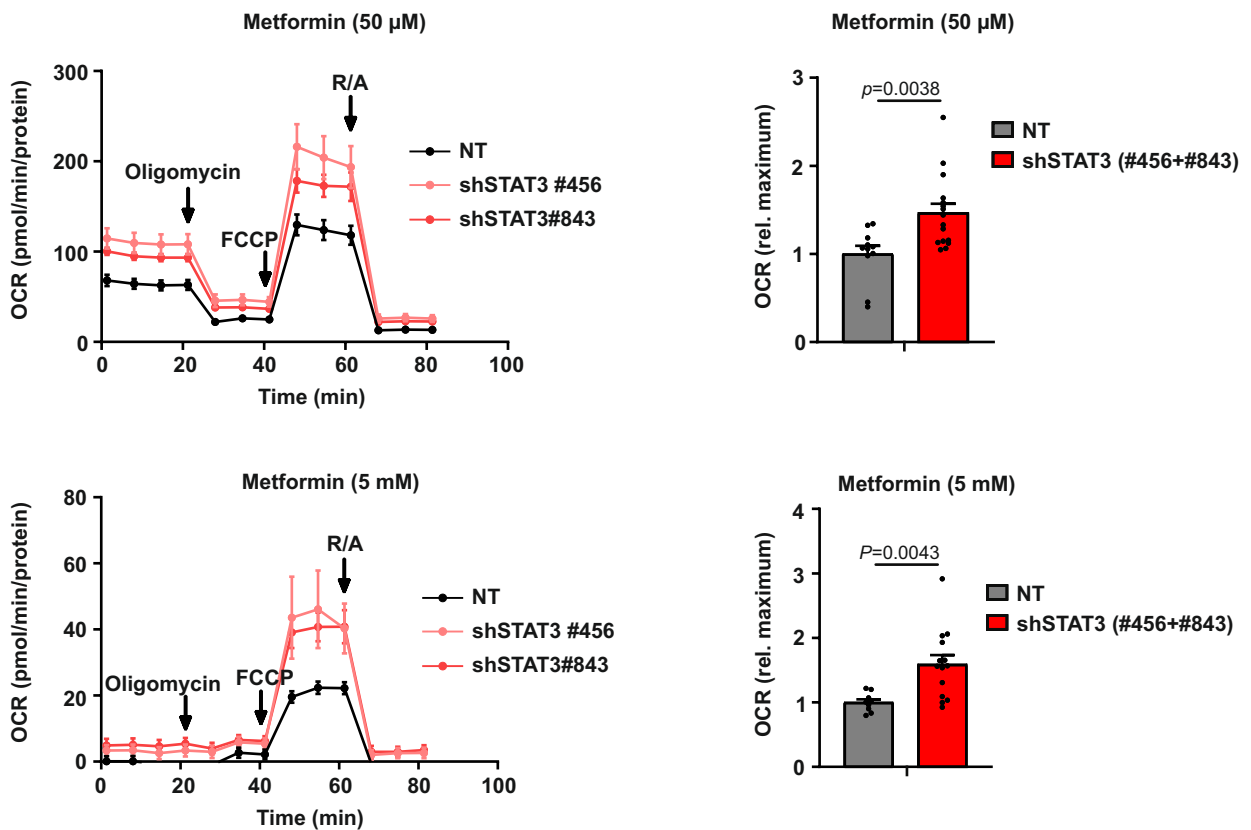

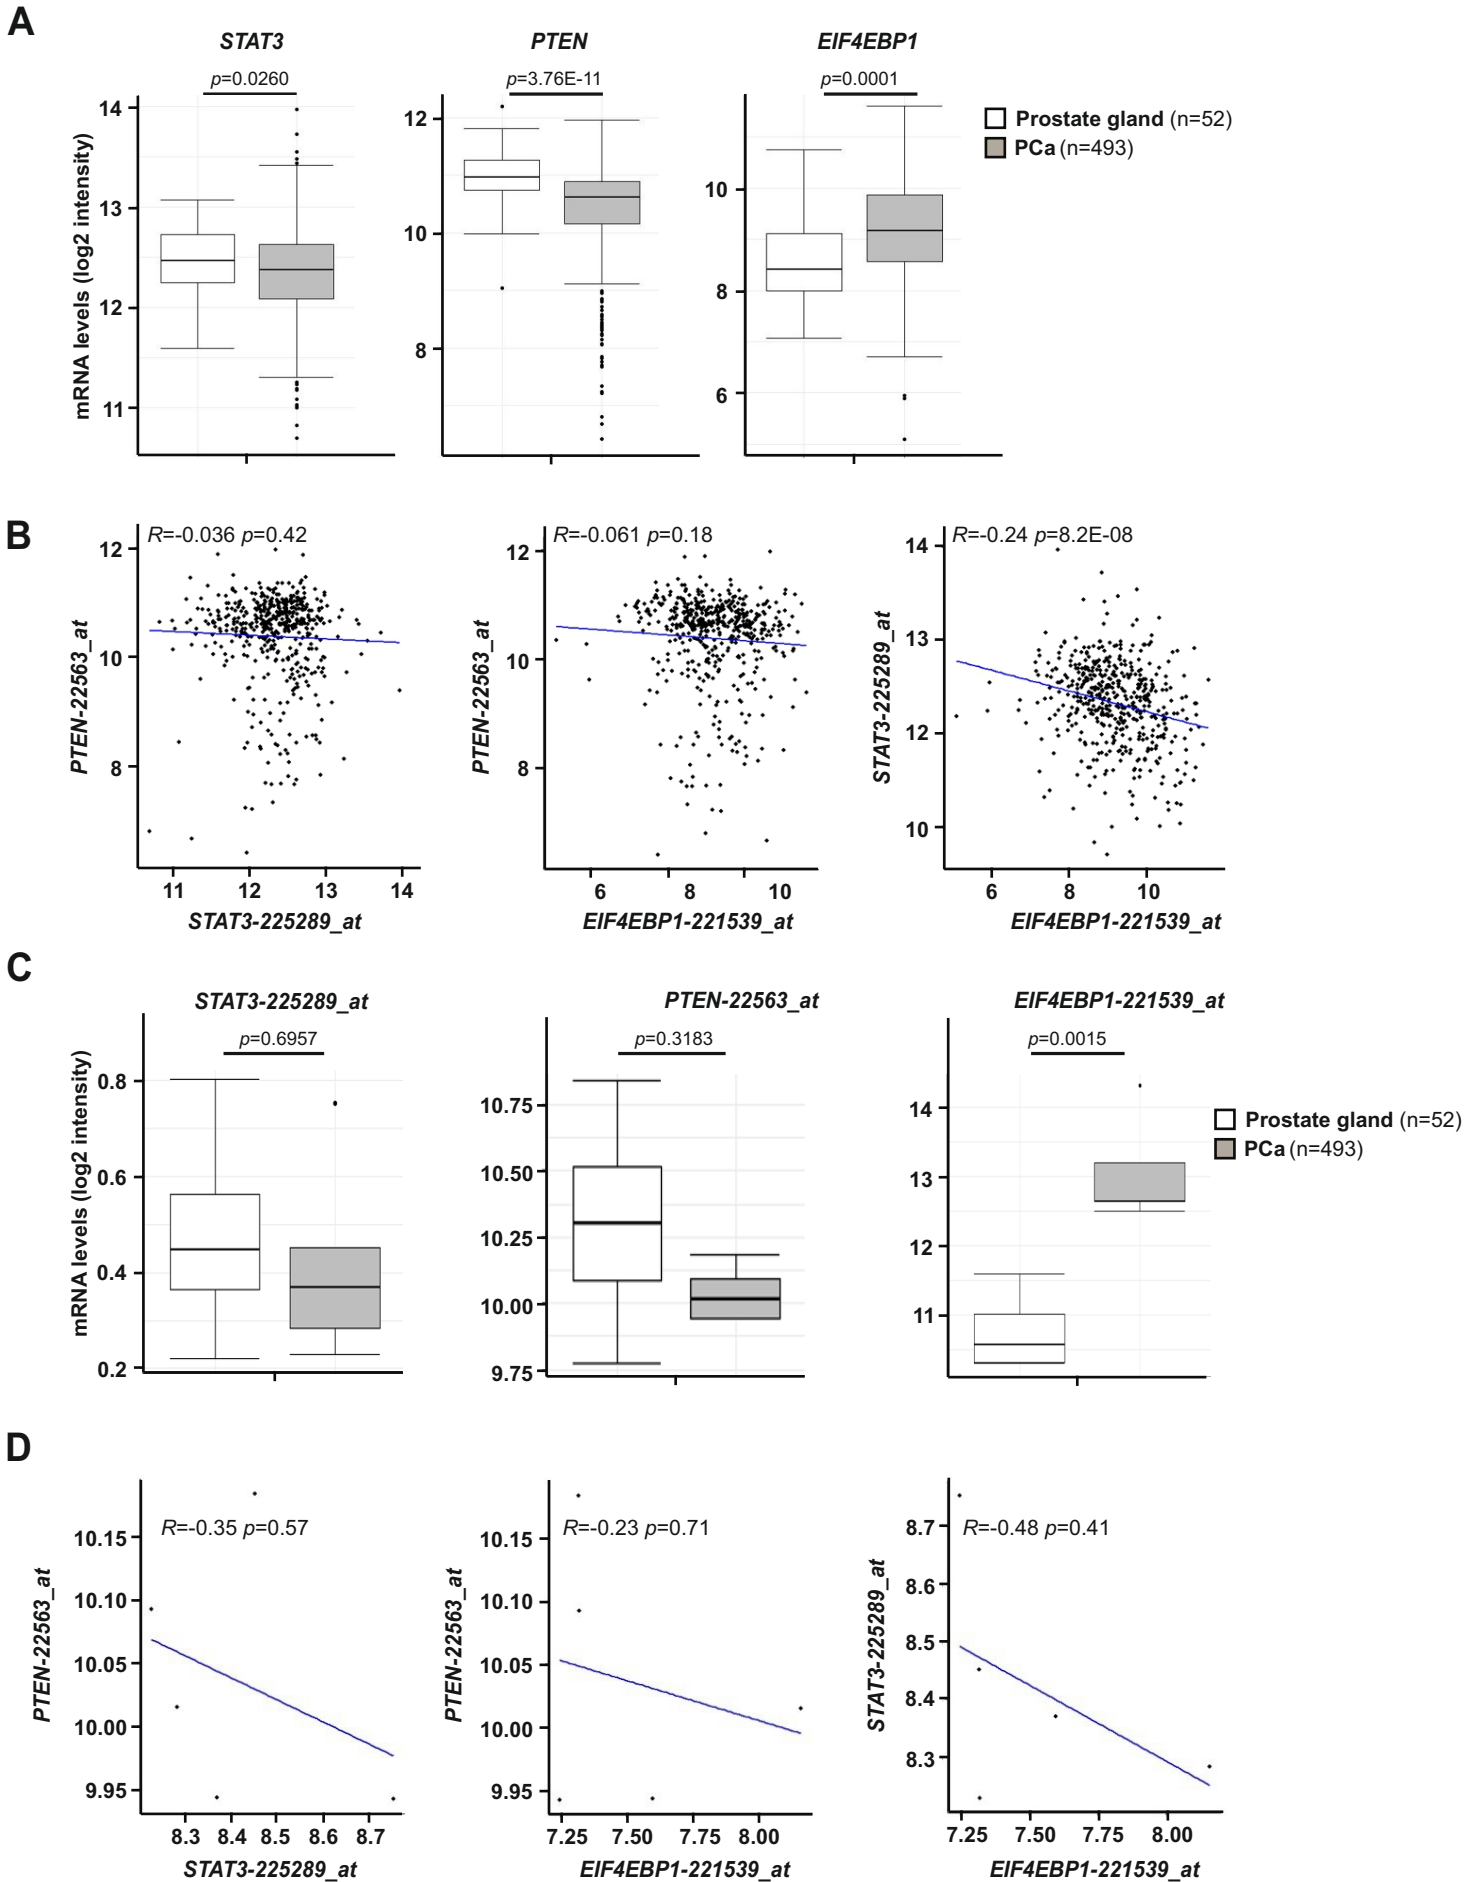

**E**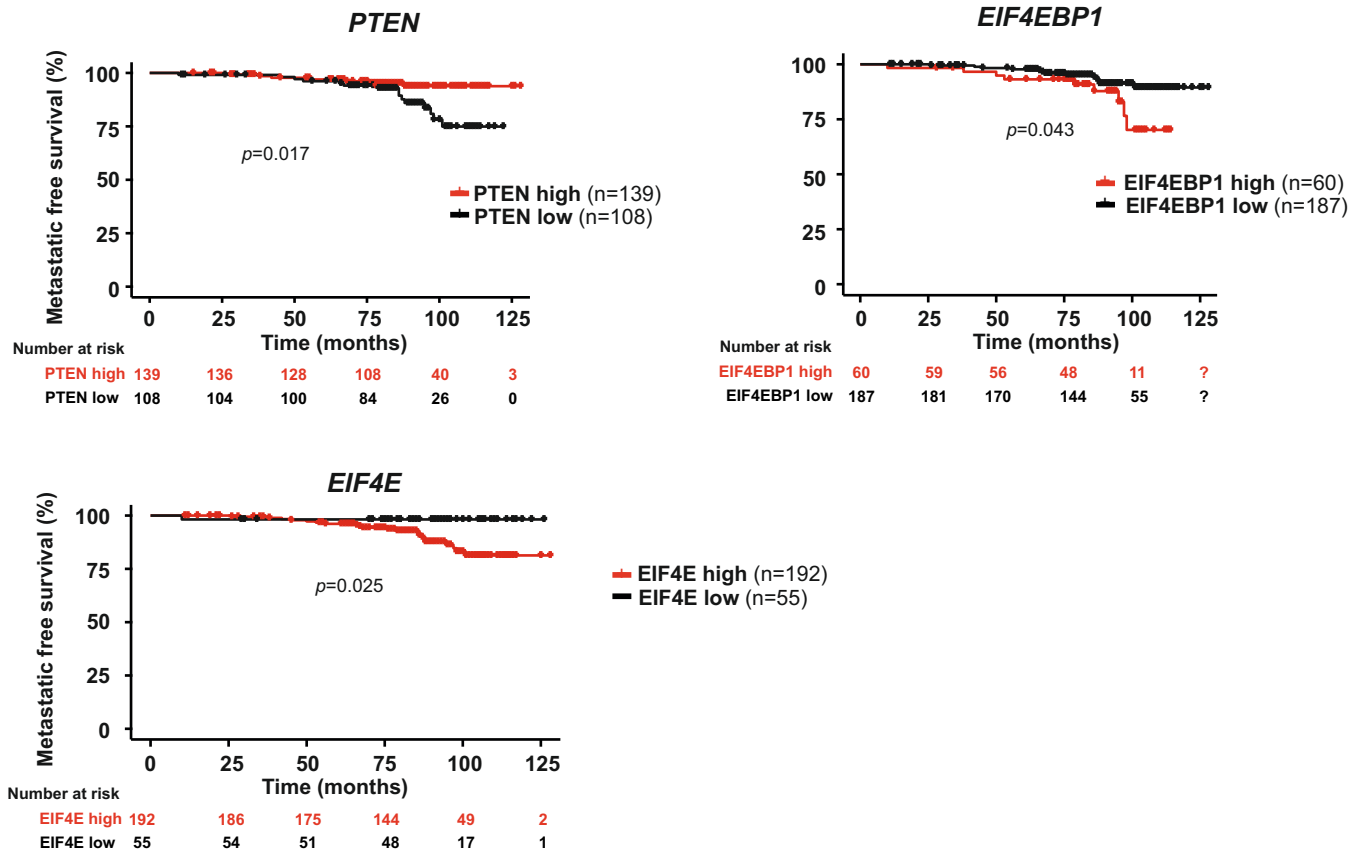**F**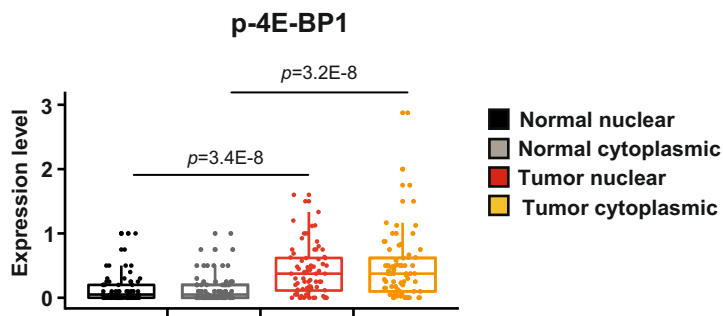**G**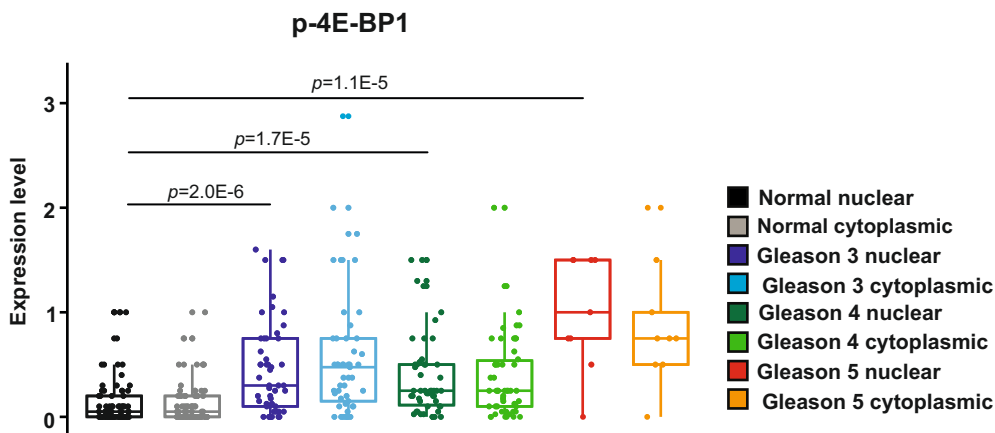

**A**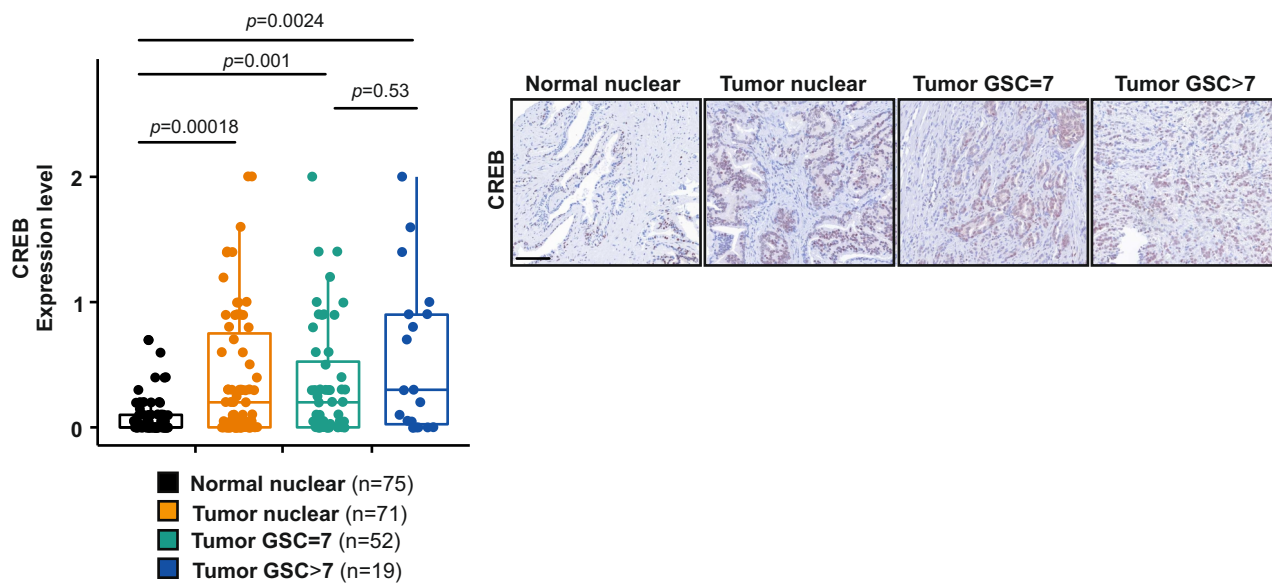**B**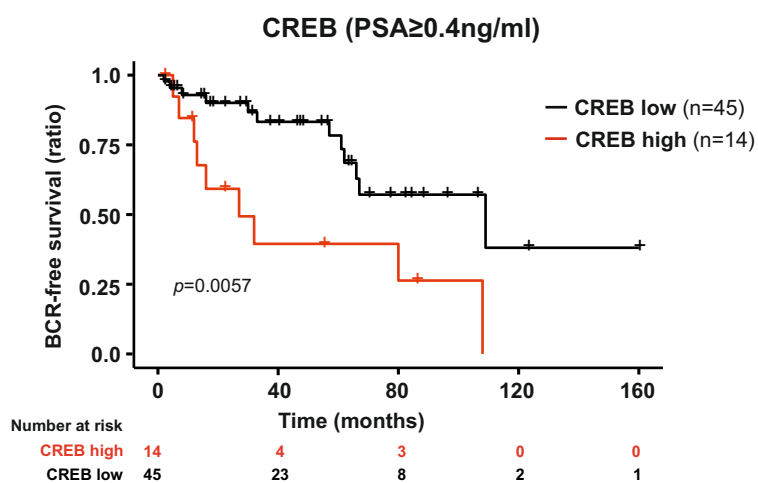



**Supplementary Table 1**

| <b>Human Primers qPCR</b> |                       |                        |
|---------------------------|-----------------------|------------------------|
| Gene name                 | Forward 5'-3'         | Reverse 5'-3'          |
| STAT3                     | TGACATTCCCAAGGAGGAGGC | TGCAGCTTCCGTTCTCAGCTCC |
| <b>Mouse Primers qPCR</b> |                       |                        |
| Gene name                 | Forward 5'-3'         | Reverse 5'-3'          |
| Stk11                     | CACACTTTACAACATCACCA  | CTCATACTCCAACATCCCTC   |
| Mo25                      | CCGTTCCCATTTGGCAAGTCT | GTCAAGCAGGTAGAGTGCCG   |
| Strada                    | TTCCCTCTGTTCCCATGTCC  | AGTCCCAGCCTTAACTGACC   |
| AMPK $\alpha$             | CACCCTCACATCATCAAAGT  | CTCCTCCAGAGACATATTCCA  |
| <b>Primers ChIP qPCR</b>  |                       |                        |
| Gene name                 | Forward 5'-3'         | Reverse 5'-3'          |
| STK11_Pr1                 | GGACCTACCGATGCCAATTA  | TGGGCAATAAGAGCGAAACT   |
| STK11_Pr2                 | CTTCCCCTGGTCCAAGAGT   | GGCGAGGTCAAGGGTCAAAA   |
| STK11_Pr1 Neg             | GAGGACGAAGTTGACCCTGA  | GAACACTTCCTCATGGACCTG  |
